# Supplementary material for: Serum pentraxin 3 as a biomarker of hepatocellular carcinoma in chronic hepatitis B virus infection
Source: PubMed Central journal article supplement (PMC7680106; doi:10.1038/s41598-020-77332-3), 2020-11-20
Supplement: 41598_2020_77332_MOESM1_ESM.pdf [file 41598_2020_77332_MOESM1_ESM.pdf]

## Serum pentraxin 3 as a biomarker of hepatocellular carcinoma in chronic hepatitis B virus infection

Huan Deng, Xiude Fan, Xiaoyun Wang, Lu Zeng, Kun Zhang, Xiaoge Zhang, Na Li, Qunying Han, Yi Lv, Zhengwen Liu

### Supplementary materials

**Table S1.** Demographic and laboratory parameters in the patients with different clinical diseases of chronic HBV infection before and after propensity score matching.

| Chronic hepatitis vs.<br>HCC | Befor propensity score matching |                 |          | After propensity score matching |                  |          |
|------------------------------|---------------------------------|-----------------|----------|---------------------------------|------------------|----------|
|                              | Chronic hepatitis               | HCC             | <i>P</i> | Chronic hepatitis               | HCC              | <i>P</i> |
|                              | (n=159)                         | (n=107)         |          | (n=44)                          | (n=44)           |          |
| Gender                       |                                 |                 | <0.001   |                                 |                  | 0.461    |
| Male,n(%)                    | 96(60.4%)                       | 92(86%)         |          | 31(70.5)                        | 35(79.5)         |          |
| Female,n(%)                  | 63(39.6%)                       | 15(14%)         |          | 13(29.5)                        | 9(20.5)          |          |
| Age(Years)                   |                                 |                 | <0.001   |                                 |                  | 0.739    |
| ≤55,n(%)                     | 149(93.7)                       | 70(65.4)        |          | 38(86.4)                        | 40(90.9)         |          |
| >55,n(%)                     | 10(6.3)                         | 37(34.6)        |          | 6(13.6)                         | 4(9.1)           |          |
| HBV DNA (IU/mL, log)         |                                 |                 | 0.028    |                                 |                  | 0.588    |
| ≤10 <sup>4</sup> ,n(%)       | 34(21.4)                        | 35(32.7)        |          | 16(36.4)                        | 16(36.4)         |          |
| >10 <sup>4</sup> ,n(%)       | 125(78.6)                       | 72(67.3)        |          | 28(63.6)                        | 28(63.6)         |          |
| ALT (IU/L)                   |                                 |                 | 0.448    |                                 |                  | 0.314    |
| ≤40,n(%)                     | 56(35.2)                        | 36(33.6)        |          | 10(22.7)                        | 13(29.5)         |          |
| >40,n(%)                     | 103(64.8)                       | 71(66.4)        |          | 34(77.3)                        | 31(70.5)         |          |
| AST (IU/L)                   |                                 |                 | 0.071    |                                 |                  | 0.052    |
| ≤40,n(%)                     | 58(36.5)                        | 29(27.1)        |          | 5(11.4)                         | 12(27.3)         |          |
| >40,n(%)                     | 101(63.5)                       | 78(72.9)        |          | 39(88.6)                        | 32(72.7)         |          |
| TBIL (μmol/L)                |                                 |                 | 0.529    |                                 |                  | 0.590    |
| ≤40,n(%)                     | 112(70.4)                       | 75(70.1)        |          | 30(68.2)                        | 30(68.2)         |          |
| >40,n(%)                     | 47(29.6)                        | 32(29.9)        |          | 14(31.8)                        | 14(31.8)         |          |
| Albumin (g/L)                |                                 |                 | <0.001   |                                 |                  | 0.500    |
| ≤32,n(%)                     | 23(14.5)                        | 48(44.9)        |          | 13(29.5)                        | 12(27.3)         |          |
| >32,n(%)                     | 136(85.5)                       | 59(55.1)        |          | 31(70.5)                        | 32(72.7)         |          |
| AFP (ng/mL)                  |                                 |                 | <0.001   |                                 |                  | 0.204    |
| ≤200,n(%)                    | 144(90.6)                       | 58(54.2)        |          | 38(86.4)                        | 34(77.3)         |          |
| >200,n(%)                    | 15(9.4)                         | 49(45.8)        |          | 6(13.6)                         | 10(22.7)         |          |
| PTX3 (ng/mL)                 | 3.7 (1.6-6.4)                   | 15.6 (9.6-24.3) | <0.001   | 4.7(1.85-6.91)                  | 19.4(10.9-25.96) | <0.001   |

### Cirrhosis vs. HCC

| Cirrhosis vs. HCC | Before propensity score matching |          |          | After propensity score matching |          |          |
|-------------------|----------------------------------|----------|----------|---------------------------------|----------|----------|
|                   | Cirrhosis                        | HCC      | <i>P</i> | Cirrhosis                       | HCC      | <i>P</i> |
|                   | (n=99)                           | (n=107)  |          | (n=61)                          | (n=61)   |          |
| Gender            |                                  |          | <0.001   |                                 |          | 0.500    |
| Male,n(%)         | 61(61.6)                         | 92(86.0) |          | 48(78.7)                        | 49(80.3) |          |

|                        |           |                 |        |                |                |        |
|------------------------|-----------|-----------------|--------|----------------|----------------|--------|
| Female,n(%)            | 38(38.4)  | 15(14.0)        |        | 13(21.3)       | 12(19.7)       |        |
| Age(Years)             |           |                 | 0.024  |                |                | 0.421  |
| ≤55,n(%)               | 78(78.8)  | 70(65.4)        |        | 42(68.9)       | 44(72.1)       |        |
| >55,n(%)               | 21(21.2)  | 37(34.6)        |        | 19(31.1)       | 17(27.9)       |        |
| HBV DNA (IU/mL, log)   |           |                 | 0.195  |                |                | 0.500  |
| ≤10 <sup>4</sup> ,n(%) | 26(26.3)  | 35(32.7)        |        | 18(29.5)       | 17(27.9)       |        |
| >10 <sup>4</sup> ,n(%) | 73(73.7)  | 72(67.3)        |        | 43(70.5)       | 44(72.1)       |        |
| ALT (IU/L)             |           |                 | 0.157  |                |                | 0.289  |
| ≤40,n(%)               | 41(41.4)  | 36(33.6)        |        | 26(42.6)       | 22(36.1)       |        |
| >40,n(%)               | 58(58.6)  | 71(66.4)        |        | 35(57.4)       | 39(63.9)       |        |
| AST (IU/L)             |           |                 | 0.252  |                |                | 0.282  |
| ≤40,n(%)               | 32(32.3)  | 29(27.1)        |        | 22(36.1)       | 18(29.5)       |        |
| >40,n(%)               | 67(67.7)  | 78(72.9)        |        | 39(63.9)       | 43(70.5)       |        |
| TBIL (μmol/L)          |           |                 | 0.411  |                |                | 0.420  |
| ≤40,n(%)               | 67(67.7)  | 75(70.1)        |        | 43(70.5)       | 45(73.8)       |        |
| >40,n(%)               | 32(32.3)  | 32(29.9)        |        | 18(29.5)       | 16(26.2)       |        |
| Albumin (g/L)          |           |                 | <0.001 |                |                | 0.234  |
| ≤32,n(%)               | 60(60.6)  | 48(44.9)        |        | 34(55.7)       | 29(47.5)       |        |
| >32,n(%)               | 39(39.4)  | 59(55.1)        |        | 27(44.3)       | 32(52.5)       |        |
| AFP (ng/mL)            |           |                 | <0.001 |                |                | 0.587  |
| ≤200,n(%)              | 86(86.9)  | 58(54.2)        |        | 48(78.7)       | 48(78.7)       |        |
| >200,n(%)              | 13(13.1)  | 49(45.8)        |        | 13(21.3)       | 13(21.3)       |        |
| PTX3 (ng/mL)           | 6.2 (3-9) | 15.6 (9.6-24.3) | <0.001 | 5.95(2.94-9.0) | 17.7(9.5-22.9) | <0.001 |

#### Non-HCC vs. HCC

|                        | Before propensity score matching |                |          | After propensity score matching |               |          |
|------------------------|----------------------------------|----------------|----------|---------------------------------|---------------|----------|
|                        | Non-HCC<br>(n=258)               | HCC<br>(n=107) | <i>P</i> | Non-HCC<br>(n=80)               | HCC<br>(n=80) | <i>P</i> |
| Gender                 |                                  |                | <0.001   |                                 |               | 0.083    |
| Male,n(%)              | 157(60.9)                        | 92(86.0)       |          | 60(75.0)                        | 68(85.0)      |          |
| Female,n(%)            | 101(39.1)                        | 15(14.0)       |          | 20(25.0)                        | 12(15.0)      |          |
| Age(Years)             |                                  |                | <0.001   |                                 |               | 0.500    |
| ≤55,n(%)               | 227(88.0)                        | 70(65.4)       |          | 60(75.0)                        | 61(76.3)      |          |
| >55,n(%)               | 31(12.0)                         | 37(34.6)       |          | 20(25.0)                        | 19(23.7)      |          |
| HBV DNA (IU/mL, log)   |                                  |                | 0.042    |                                 |               | 0.033    |
| ≤10 <sup>4</sup> ,n(%) | 60(23.3)                         | 35(32.7)       |          | 33(41.3)                        | 21(26.3)      |          |
| >10 <sup>4</sup> ,n(%) | 198(76.7)                        | 72(67.3)       |          | 47(58.8)                        | 59(73.7)      |          |
| ALT (IU/L)             |                                  |                | 0.277    |                                 |               | 0.500    |
| ≤40,n(%)               | 97(37.6)                         | 36(33.6)       |          | 30(37.5)                        | 21(26.3)      |          |
| >40,n(%)               | 161(62.4)                        | 71(66.4)       |          | 50(62.5)                        | 59(73.7)      |          |
| AST (IU/L)             |                                  |                | 0.092    |                                 |               | 0.500    |
| ≤40,n(%)               | 90(34.9)                         | 29(27.1)       |          | 25(31.3)                        | 24(30.0)      |          |
| >40,n(%)               | 168(65.1)                        | 78(72.9)       |          | 55(68.7)                        | 56(70.0)      |          |
| TBIL (μmol/L)          |                                  |                | 0.499    |                                 |               | 0.069    |
| ≤40,n(%)               | 179(69.4)                        | 75(70.1)       |          | 46(57.5)                        | 56(70.0)      |          |

|               |                 |                 |        |                 |                 |        |
|---------------|-----------------|-----------------|--------|-----------------|-----------------|--------|
| >40,n(%)      | 79(30.6)        | 32(29.9)        |        | 34(42.5)        | 24(30.0)        |        |
| Albumin (g/L) |                 |                 | 0.015  |                 |                 | 0.436  |
| ≤32,n(%)      | 83(32.2)        | 48(44.9)        |        | 31(38.7)        | 33(41.3)        |        |
| >32,n(%)      | 175(67.8)       | 59(55.1)        |        | 49(61.3)        | 47(58.7)        |        |
| AFP (ng/mL)   |                 |                 | <0.001 |                 |                 | 0.500  |
| ≤200,n(%)     | 230(89.1)       | 58(54.2)        |        | 55(68.7)        | 54(67.5)        |        |
| >200,n(%)     | 28(10.9)        | 49(45.8)        |        | 25(31.3)        | 26(32.5)        |        |
| PTX3 (ng/mL)  | 5.07(2.03-7.86) | 15.6 (9.6-24.3) | <0.001 | 4.99(2.38-8.91) | 16.5(10.3-25.7) | <0.001 |

HBV, hepatitis B virus; HCC, hepatocellular carcinoma; ALT, alanine aminotransferase; AST, aspartate aminotransferase; TBIL, total bilirubin; PTX3, pentraxin 3; AFP,  $\alpha$ -fetoprotein.

**Table S2.** Diagnostic performance of serum PTX3, AFP and the combination of PTX3 with AFP levels for HCC in chronic hepatitis, cirrhosis and chronic HBV infection without HCC (CH+LC) after propensity score matching.

|               | AUC (95% CI)        | Cutoff<br>(ng/mL) | Sensitivity<br>(%) | Specificity<br>(%) | Youden<br>index | PPV<br>(%) | NPV<br>(%) | Positive<br>LR | Negative<br>LR |
|---------------|---------------------|-------------------|--------------------|--------------------|-----------------|------------|------------|----------------|----------------|
| HCC vs. CH    |                     |                   |                    |                    |                 |            |            |                |                |
| PTX3          | 0.954 (0.887-0.987) | 8.958             | 90.91              | 88.64              | 0.796           | 88.9       | 90.7       | 8.0            | 0.1            |
| AFP           | 0.514 (0.405-0.622) | 5.00              | 77.27              | 2.27               | 0.205           | 44.2       | 9.1        | 0.79           | 10             |
| PTX3+AFP      | 0.959 (0.893-0.990) | -                 | 86.36              | 95.45              | 0.818           | 95         | 87.5       | 19             | 0.14           |
| HCC vs. LC    |                     |                   |                    |                    |                 |            |            |                |                |
| PTX3          | 0.914 (0.849-0.957) | 10.143            | 72.13              | 95.08              | 0.6721          | 93.6       | 77.3       | 14.67          | 0.29           |
| AFP           | 0.602 (0.510-0.690) | 16.58             | 67.21              | 55.74              | 0.229           | 60.3       | 63         | 1.52           | 0.59           |
| PTX3+AFP      | 0.926 (0.865-0.966) | -                 | 75.41              | 98.36              | 0.784           | 97.9       | 80         | 46             | 0.25           |
| HCC vs. CH+LC |                     |                   |                    |                    |                 |            |            |                |                |
| PTX3          | 0.936 (0.887-0.969) | 9.013             | 87.5               | 83.75              | 0.713           | 84.3       | 87         | 5.38           | 0.15           |
| AFP           | 0.575 (0.495-0.653) | 25.90             | 27.5               | 96.25              | 0.238           | 88         | 57         | 7.33           | 0.75           |
| PTX3+AFP      | 0.944 (0.896-0.974) | -                 | 77.5               | 98.75              | 0.763           | 98.4       | 81.4       | 62             | 0.23           |

PTX3, pentraxin 3; AFP, alpha-fetoprotein; HBV, hepatitis B virus; HCC, hepatocellular carcinoma; CH, chronic hepatitis; LC, liver cirrhosis; AUC, area under receiver operating characteristic (ROC) curve; PPV, positive predictive value; NPV, negative predictive value; LR, likelihood ratio.

**Table S3.** Characteristics of patients with chronic HBV infection under and not under antiviral treatment.

|                      | Antiviral<br>(n=87) | Non-antiviral<br>(n=278) | <i>P</i> |
|----------------------|---------------------|--------------------------|----------|
| Gender (M/F)         | 62/25               | 187/91                   | 0.485    |
| Age (years)          | 44.5±11.19(18-66)   | 40.3±14.26(18-78)        | 0.045    |
| HBV DNA (IU/mL, log) | 5.32±1.82           | 5.51±1.71                | 0.410    |
| ALT (IU/L)           | 51(14-1040)         | 59(7-3629)               | 0.435    |
| AST (IU/L)           | 61(19-1022)         | 64(13-4082)              | 0.538    |
| TBIL (μmol/L)        | 26.3(2.7-470)       | 21.4(1.48-727)           | 0.344    |
| Albumin (g/L)        | 33.8(18.8-46.8)     | 36.4(18.8-51.3)          | 0.056    |
| AFP (ng/mL)          | 22.2(1.63-97982)    | 13.35(1.15-325900)       | 0.062    |
| PTX3 (ng/mL)         | 8.57(0.384-56.6)    | 6.31(0.089-42.7)         | 0.034    |

HBV, hepatitis B virus; AFP,  $\alpha$ -fetoprotein; HCC, ALT, alanine aminotransferase; AST, aspartate aminotransferase; TBIL, total bilirubin; PTX3, pentraxin 3.

**Table S4.** Diagnostic performance of PTX3, AFP and the combination of PTX3 with AFP for HCC in chronic HBV infection without HCC (CH+LC) under and not under antiviral treatment.

|                 | AUC (95% CI)        | Cutoff<br>(ng/mL) | Sensitivity<br>(%) | Specificity<br>(%) | Youden<br>index | PPV<br>(%) | NPV<br>(%) | Positive<br>LR | Negative<br>LR |
|-----------------|---------------------|-------------------|--------------------|--------------------|-----------------|------------|------------|----------------|----------------|
| <b>PTX3</b>     |                     |                   |                    |                    |                 |            |            |                |                |
| Antiviral       |                     |                   |                    |                    |                 |            |            |                |                |
| HCC vs. CH+LC   | 0.923 (0.865-0.982) | 9.708             | 80                 | 89.47              | 69.47           | 80         | 89.5       | 7.6            | 0.22           |
| Non-antiviral   |                     |                   |                    |                    |                 |            |            |                |                |
| HCC vs. CH+LC   | 0.929 (0.896-0.963) | 9.231             | 79.22              | 91.54              | 70.76           | 78.2       | 92         | 9.37           | 0.23           |
| <b>AFP</b>      |                     |                   |                    |                    |                 |            |            |                |                |
| Antiviral       |                     |                   |                    |                    |                 |            |            |                |                |
| HCC vs. CH+LC   | 0.731 (0.609-0.852) | 965.8             | 43.33              | 100.00             | 43.33           | 100        | 77         | -              | 0.57           |
| Non-antiviral   |                     |                   |                    |                    |                 |            |            |                |                |
| HCC vs. CH+LC   | 0.729 (0.653-0.804) | 20.3              | 68.83              | 74.13              | 42.94           | 50.5       | 86.1       | 2.66           | 0.43           |
| <b>PTX3+AFP</b> |                     |                   |                    |                    |                 |            |            |                |                |
| Antiviral       |                     |                   |                    |                    |                 |            |            |                |                |
| HCC vs. CH+LC   | 0.947 (0.900-0.994) | -                 | 76.67              | 98.25              | 74.91           | 98.5       | 88.9       | 43.7           | 0.24           |
| Non-antiviral   |                     |                   |                    |                    |                 |            |            |                |                |
| HCC vs. CH+LC   | 0.952 (0.927-0.977) | -                 | 80.52              | 96.02              | 76.54           | 88.6       | 92.8       | 20.23          | 0.2            |

PTX3, pentraxin 3; AFP,  $\alpha$ -fetoprotein; HCC, hepatocellular carcinoma; CH, chronic hepatitis; LC, liver cirrhosis; AUC, area under receiver operating characteristic (ROC) curve; PPV, positive predictive value; NPV, negative predictive value; LR, likelihood ratio.

**Table S5.** Characteristics of patients with AFP negative ( $\leq 20$ ng/mL) and positive ( $>20$ ng/mL) HCC.

| Variables               | AFP negative (n=32)      | AFP positive (n=75)      | <i>P</i> |
|-------------------------|--------------------------|--------------------------|----------|
| Gender (Male,%)         | 91 (29/32)               | 84 (63/75)               | 0.549    |
| Age (year)              | 49.69 $\pm$ 2.14 (23-77) | 49.33 $\pm$ 1.21 (18-68) | 0.878    |
| HBV DNA (IU/mL, log)    | 4.95 $\pm$ 0.28          | 4.88 $\pm$ 0.17          | 0.883    |
| ALT (IU/L)              | 44 (29.3-77.5)           | 56 (35-108)              | 0.069    |
| AST (IU/L)              | 46 (29-81.6)             | 90 (52-186)              | 0.001    |
| TBIL ( $\mu$ mol/L)     | 15.4 (12.8-29.8)         | 32 (19.2-73.5)           | 0.000    |
| Albumin (g/L)           | 37.9 (30.9-40.6)         | 31.6 (28.9-37.4)         | 0.004    |
| PTX3 (ng/mL)            | 16 (11-24.8)             | 14.5 (9.4-29.3)          | 0.346    |
| BCLC stages (0/A/B/C/D) | 5/19/5/1/2               | 12/32/12/12/7            | 0.327    |

HBV, hepatitis B virus; AFP,  $\alpha$ -fetoprotein; HCC, ALT, alanine aminotransferase; AST, aspartate aminotransferase; TBIL, total bilirubin; PTX3, pentraxin 3.

**Table S6.** Diagnostic performance of PTX3, AFP and the combination of PTX3 with AFP for AFP negative ( $\leq 20$ ng/mL) and positive ( $>20$ ng/mL) HCC in chronic hepatitis, cirrhosis and chronic HBV infection without HCC (CH+LC).

|                         | AUC (95% CI)        | Cutoff (ng/mL) | Sensitivity (%) | Specificity (%) | Youden index | PPV (%) | NPV (%) | Positive LR | Negative LR |
|-------------------------|---------------------|----------------|-----------------|-----------------|--------------|---------|---------|-------------|-------------|
| <b>AFP negative HCC</b> |                     |                |                 |                 |              |         |         |             |             |
| HCC vs. CH              |                     |                |                 |                 |              |         |         |             |             |
| PTX3                    | 0.956 (0.909-0.983) | 8.949          | 90.6            | 91.2            | 81.8         | 74.7    | 97.2    | 10.24       | 0.10        |
| AFP                     | 0.625 (0.540-0.704) | 3.43           | 40.6            | 86.7            | 27.4         | 46.4    | 83.8    | 3.06        | 0.68        |
| PTX3+AFP                | 0.958 (0.912-0.984) | -              | 93.8            | 87.6            | 81.4         | 68.2    | 98      | 7.57        | 0.07        |
| HCC vs. LC              |                     |                |                 |                 |              |         |         |             |             |
| PTX3                    | 0.933 (0.865-0.973) | 10.143         | 81.3            | 95.6            | 76.8         | 89.7    | 91.5    | 18.42       | 0.2         |
| AFP                     | 0.531 (0.429-0.632) | 7.64           | 65.6            | 51.5            | 17.1         | 38.9    | 76.1    | 1.35        | 0.67        |
| PTX3+AFP                | 0.932 (0.864-0.973) | -              | 81.3            | 94.1            | 75.4         | 86.7    | 91.4    | 13.81       | 0.2         |
| HCC vs. CH+LC           |                     |                |                 |                 |              |         |         |             |             |
| PTX3                    | 0.947 (0.908-0.973) | 8.985          | 90.6            | 86.1            | 76.7         | 53.7    | 98.1    | 6.53        | 0.11        |
| AFP                     | 0.587 (0.518-0.654) | 7.64           | 65.6            | 57.2            | 22.9         | 21.4    | 90.4    | 1.53        | 0.6         |
| PTX3+AFP                | 0.948 (0.909-0.974) | -              | 84.4            | 92.2            | 76.6         | 65.9    | 97.1    | 10.58       | 0.17        |
| <b>AFP positive HCC</b> |                     |                |                 |                 |              |         |         |             |             |
| HCC vs. CH              |                     |                |                 |                 |              |         |         |             |             |
| PTX3                    | 0.927 (0.865-0.966) | 9.304          | 76              | 93.5            | 69.5         | 95      | 70.5    | 11.65       | 0.26        |
| AFP                     | 0.718 (0.629-0.796) | 20.36          | 54.7            | 91.3            | 46.0         | 91.1    | 55.3    | 6.29        | 0.5         |
| PTX3+AFP                | 0.942 (0.892-0.973) | -              | 81.3            | 96.2            | 77.5         | 95.3    | 84.3    | 21.15       | 0.19        |
| HCC vs. LC              |                     |                |                 |                 |              |         |         |             |             |
| PTX3                    | 0.887 (0.810-0.940) | 11.719         | 65.3            | 100             | 65.3         | 100     | 54.5    | -           | 0.35        |
| AFP                     | 0.718 (0.622-0.810) | 20.0           | 53.3            | 100             | 53.3         | 100     | 47      | -           | 0.47        |
| PTX3+AFP                | 0.931 (0.865-0.971) | -              | 81.33           | 100             | 81.33        | 100     | 68.9    | -           | 0.19        |

HCC vs. CH+LC

|          |                     |       |      |      |      |      |      |       |      |
|----------|---------------------|-------|------|------|------|------|------|-------|------|
| PTX3     | 0.912 (0.855-0.952) | 9.168 | 77.3 | 89.7 | 67.1 | 89.7 | 80.5 | 7.54  | 0.25 |
| AFP      | 0.721 (0.643-0.790) | 20.36 | 54.7 | 93.6 | 48.3 | 89.1 | 68.2 | 8.53  | 0.48 |
| PTX3+AFP | 0.942 (0.892-0.973) | -     | 81.3 | 96.2 | 77.5 | 95.3 | 84.3 | 21.15 | 0.19 |

PTX3, pentraxin 3; AFP, alpha-fetoprotein; HBV, hepatitis B virus; HCC, hepatocellular carcinoma; CH, chronic hepatitis; LC, liver cirrhosis; AUC, area under receiver operating characteristic (ROC) curve; PPV, positive predictive value; NPV, negative predictive value; LR, likelihood ratio.

**Table S7.** Characteristics of patients with early stage and late stage HCC.

| Variables            | Early (n=68)     | Late (n=39)     | <i>P</i> |
|----------------------|------------------|-----------------|----------|
| Gender (Male,%)      | 90 (61/68)       | 79 (31/39)      | 0.143    |
| Age (year)           | 49±1.40 (18-77)  | 50±1.56 (36-68) | 0.584    |
| HBV DNA (IU/mL, log) | 4.87±0.19        | 4.97±0.23       | 0.454    |
| ALT (IU/L)           | 45 (29-100)      | 63(41-103)      | 0.080    |
| AST (IU/L)           | 59 (29.5-128.8)  | 105 (56-201)    | 0.003    |
| TBIL (µmol/L)        | 22.1 (13.5-35.5) | 37 (19-112)     | 0.002    |
| Albumin (g/L)        | 35 (29.8-40.2)   | 31 (27.4-36.8)  | 0.009    |
| AFP (ng/mL)          | 59 (6.8-2357)    | 689 (22.6-5814) | 0.033    |
| PTX3 (ng/mL)         | 15 (9.4-22.3)    | 19 (9.7-28.7)   | 0.158    |

HBV, hepatitis B virus; AFP,  $\alpha$ -fetoprotein; HCC, ALT, alanine aminotransferase; AST, aspartate aminotransferase; TBIL, total bilirubin; PTX3, pentraxin 3.

**Table S8.** Diagnostic performance of PTX3, AFP and the combination of PTX3 with AFP for early and late stage HCC in chronic hepatitis, cirrhosis and chronic HBV infection without HCC (CH+LC).

|                        | AUC (95% CI)        | Cutoff<br>(ng/mL) | Sensitivity<br>(%) | Specificity<br>(%) | Youden<br>index | PPV<br>(%) | NPV<br>(%) | Positive<br>LR | Negative<br>LR |
|------------------------|---------------------|-------------------|--------------------|--------------------|-----------------|------------|------------|----------------|----------------|
| <b>Early stage HCC</b> |                     |                   |                    |                    |                 |            |            |                |                |
| HCC vs. CH             |                     |                   |                    |                    |                 |            |            |                |                |
| PTX3                   | 0.935 (0.894-0.963) | 7.067             | 94.1               | 79.3               | 73.4            | 66         | 96.9       | 4.53           | 0.074          |
| AFP                    | 0.665 (0.599-0.726) | 20.36             | 64.7               | 72.3               | 37              | 50         | 82.7       | 2.34           | 0.49           |
| PTX3+AFP               | 0.957 (0.922-0.979) | -                 | 97.1               | 79.3               | 76.3            | 66.7       | 98.4       | 4.68           | 0.037          |
| HCC vs. LC             |                     |                   |                    |                    |                 |            |            |                |                |
| PTX3                   | 0.897 (0.840-0.938) | 10.833            | 69.1               | 98.0               | 67.1            | 95.9       | 82.2       | 34.21          | 0.32           |
| AFP                    | 0.679 (0.603-0.749) | 22.22             | 63.2               | 70.7               | 33.9            | 59.7       | 73.7       | 2.16           | 0.52           |
| PTX3+AFP               | 0.936 (0.888-0.968) | -                 | 79.4               | 98                 | 77.4            | 96.4       | 87.4       | 39.31          | 0.21           |
| HCC vs. CH+LC          |                     |                   |                    |                    |                 |            |            |                |                |
| PTX3                   | 0.920 (0.885-0.947) | 9.359             | 76.5               | 90.70              | 67.2            | 68.4       | 93.6       | 8.22           | 0.26           |
| AFP                    | 0.670 (0.616-0.721) | 20.36             | 64.7               | 70.5               | 35.3            | 36.7       | 88.3       | 2.20           | 0.50           |
| PTX3+AFP               | 0.948 (0.918-0.970) | -                 | 79.4               | 96.1               | 75.5            | 84.4       | 94.7       | 20.49          | 0.21           |
| <b>Late stage HCC</b>  |                     |                   |                    |                    |                 |            |            |                |                |
| HCC vs. CH             |                     |                   |                    |                    |                 |            |            |                |                |
| PTX3                   | 0.958 (0.920-0.981) | 8.949             | 89.7               | 89.3               | 79.1            | 67.3       | 97.3       | 8.39           | 0.11           |
| AFP                    | 0.826 (0.766-0.876) | 20.36             | 79.5               | 72.3               | 51.8            | 41.3       | 93.5       | 2.87           | 0.28           |
| PTX3+AFP               | 0.965 (0.928-0.986) | -                 | 92.3               | 86.8               | 79.1            | 63.2       | 97.9       | 6.99           | 0.09           |
| HCC vs. LC             |                     |                   |                    |                    |                 |            |            |                |                |
| PTX3                   | 0.924 (0.867-0.962) | 9.231             | 84.6               | 84.9               | 69.5            | 68.7       | 93.9       | 5.58           | 0.18           |
| AFP                    | 0.833 (0.760-0.891) | 23.10             | 56.4               | 95                 | 51.4            | 81.5       | 84.7       | 11.17          | 0.46           |
| PTX3+AFP               | 0.944 (0.892-0.976) | -                 | 82.1               | 100                | 82.1            | 100        | 93.4       | -              | 0.18           |
| HCC vs. CH+LC          |                     |                   |                    |                    |                 |            |            |                |                |
| PTX3                   | 0.945 (0.913-0.968) | 9.231             | 84.6               | 89.9               | 74.5            | 55.9       | 97.5       | 8.4            | 0.17           |
| AFP                    | 0.829 (0.781-0.870) | 20.36             | 69.2               | 81.8               | 51              | 36.5       | 94.6       | 3.80           | 0.38           |
| PTX3+AFP               | 0.956 (0.926-0.976) | -                 | 82.1               | 96.1               | 78.2            | 76.2       | 97.3       | 21.17          | 0.19           |

PTX3, pentraxin 3; HCC, hepatocellular carcinoma; CH, chronic hepatitis; LC, liver cirrhosis; AUC, area under receiver operating characteristic (ROC) curve; PPV, positive predictive value; NPV, negative predictive value; LR, likelihood ratio.

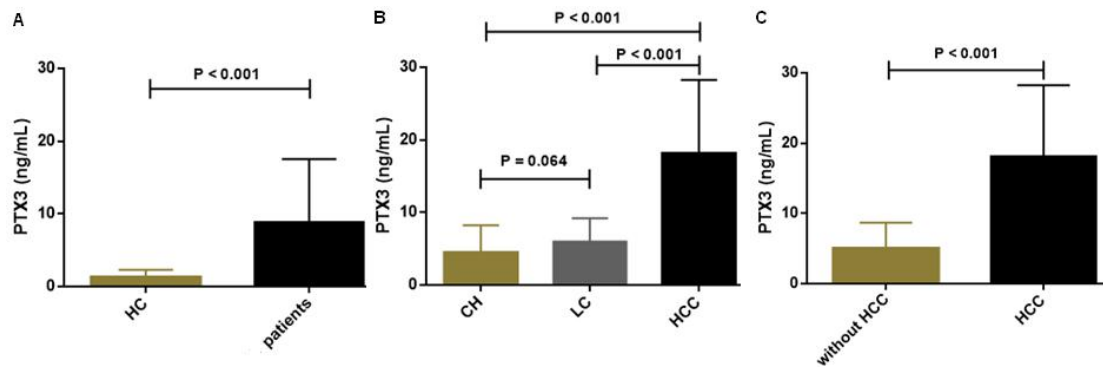

**Figure S1. Serum PTX3 levels in patients with chronic hepatitis B virus infection of different disease conditions.** **A.** Comparison of PTX3 levels between healthy controls (HC) and patients with chronic HBV infection; **B.** Comparison of PTX3 levels between patients with chronic hepatitis (CH), liver cirrhosis (LC) and hepatocellular carcinoma (HCC); **C.** Comparison of PTX3 levels between patients without and with HCC.

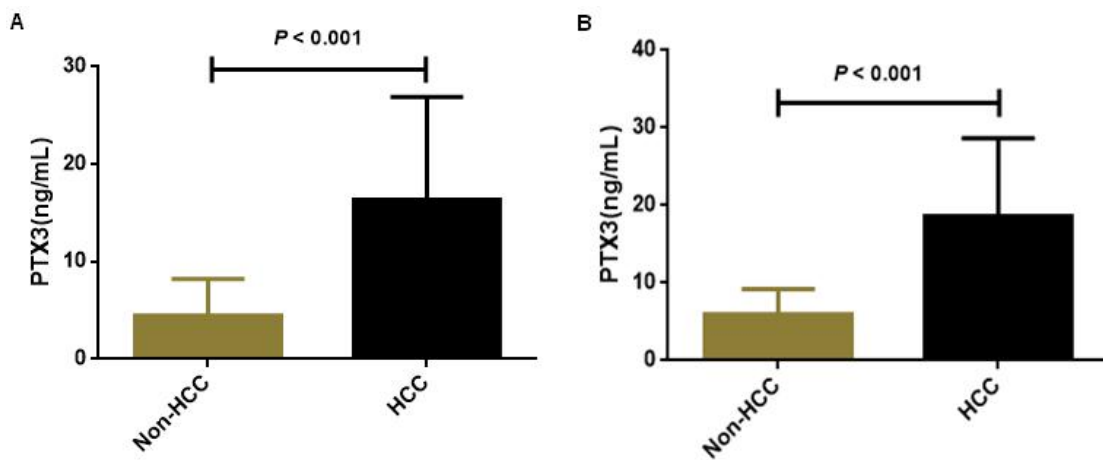

**Figure S2. Serum PTX3 levels in patients with hepatocellular carcinoma (HCC) of different underlying liver disease.** **A.** Comparison of PTX3 levels between chronic hepatitis patients without and with HCC; **B.** Comparison of PTX3 levels between cirrhosis patients without and with HCC.



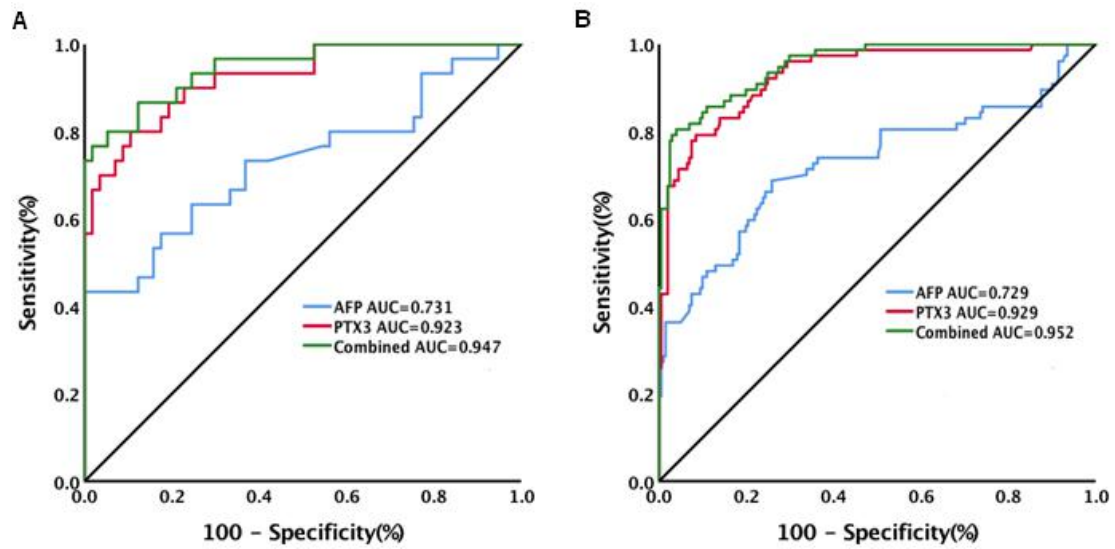

**Figure S3. Diagnostic performance of serum PTX3, AFP and combination of PTX3 with AFP for hepatocellular carcinoma (HCC) in patients with chronic HBV infection (chronic hepatitis and cirrhosis) under antiviral treatment and not under antiviral treatment. A.** Diagnostic performance of serum PTX3, AFP and combination of PTX3 with AFP for HCC in patients with chronic HBV infection under antiviral treatment. **B.** Diagnostic performance of serum PTX3, AFP and combination of PTX3 with AFP for HCC in patients with chronic HBV infection not under antiviral treatment.
